# Supplementary material for: Promising Results of Associating Liver Partition and Portal Vein Ligation for Staged Hepatectomy for Perihilar Cholangiocarcinoma in a Systematic Review and Single-Arm Meta-Analysis
Source: MDPI journal article supplement (doi:10.3390/cancers16040771), 2024-02-13
Supplement: s1 [file s1]

# Promising Results of Associating Liver Partition and Portal Vein Ligation for Staged Hepatectomy for Perihilar Cholangiocarcinoma in a Systematic Review and Single-Arm Meta-Analysis

**Supplementary Table S1.** ALPPS indication, PHLF definition and cause of mortality in included studies.

| Authors               | Indication                                                                                                      | PHLF         | Grade A | Grade B      | Grade C | Mortality                                |
|-----------------------|-----------------------------------------------------------------------------------------------------------------|--------------|---------|--------------|---------|------------------------------------------|
| Schnitzbauer 2012 [7] | FLR/BW ratio < 0.5                                                                                              | Not reported |         | Not reported |         | -                                        |
| Alvarez 2013 [10]     | FLR < 30%                                                                                                       | ISGLS        |         | Not reported |         | -                                        |
| Nadalin 2014 [22]     | FLR <25% or FLR/BW ratio <0.5                                                                                   | Not reported |         | Not reported |         | Septic shock and MOF (n=1); 1 PHLF (n=1) |
| Ratti 2014 [23]       | FLR after PVE <25% (normal parenchyma) or <40% (in other cases)                                                 | 50-50 Balzan |         | Not reported |         | Septic shock and MOF (n=1)               |
| Vivarelli 2015 [25]   | FLR<30%                                                                                                         | 50-50 Balzan |         | Not reported |         | PHLF (n=1)                               |
| Kremer 2016 [24]      | Not reported                                                                                                    | ISGLS        |         | Not reported |         | ND                                       |
| Rosok 2016 [26]       | FLR/BW ratio <0.5% or FLR <30% for patients with CRLM and FLR <40% in cases of suspected or confirmed cirrhosis | Not reported |         | Not reported |         | -                                        |

|                     |                                                                          |              |                                |   |   |                                             |                                |
|---------------------|--------------------------------------------------------------------------|--------------|--------------------------------|---|---|---------------------------------------------|--------------------------------|
| Serenari 2016 [27]  | Not reported                                                             | ISGLS        | Not reported                   |   |   | Septic shock (n=2), Cardiogenic shock (n=1) |                                |
| Sakamoto 2018 [28]  | FLR<30%                                                                  | Not reported | Not reported                   |   |   | -                                           |                                |
| Kumar 2019 [29]     | FLR<20-30% for normal liver and FLR <40% in cases with compromised liver | Not reported | Not reported                   |   |   | -                                           |                                |
| Balci 2020 [30]     | FLR<30%                                                                  | Not reported | Not reported                   |   |   | -                                           |                                |
| Melekhina 2020 [31] | FLR<40%                                                                  | ISGLS        | 0                              | 1 | 0 | -                                           |                                |
| Chebaro 2021 [32]   |                                                                          |              | Not reported                   |   |   |                                             |                                |
| Hotineanu 2021 [33] | FLR<30%                                                                  | Not reported | Not reported                   |   |   | -                                           |                                |
| Stavrou 2022 [34]   |                                                                          |              | Not reported                   |   |   |                                             |                                |
| Steffani 2022 [35]  | FLR<40%                                                                  | ISGLS        | Not reported                   |   |   | -                                           |                                |
| Balci 2023 [21]     | FLR < 30% or FLR/BW ratio <0.5                                           |              | 9                              | 5 | 6 | PHLF (n=1), Bile leak with PHLF (n=1),      |                                |
|                     |                                                                          | ISGLS        | Bile leak with pneumonia (n=1) |   |   |                                             |                                |
| Mehrabi 2023 [20]   | FLR<30%                                                                  | ISGLS        | 0                              | 0 | 2 | PHLF with MOF (n=2), Septic shock (n=2),    |                                |
|                     |                                                                          |              |                                |   |   |                                             | Necrotizing pancreatitis (n=1) |

ALPPS: Associating Liver Partition and Portal vein Ligation for Staged hepatectomy; BW: Body weight; CRLM: Colorectal liver metastases; FLR: Future remnant volume; ISGLS: International Study Group of Liver Surgery; MOF: Multiple organ failure; PHLF: Posthepatectomy liver failure; PVE: Portal vein embolization.
